# Supplementary figures and images for: pKr-2 induces neurodegeneration via upregulation of microglial TLR4 in the hippocampus of AD brain
Source: PubMed Central journal article supplement — Brain Behav Immun Health. 2023 Jan 18;28:100593. doi: 10.1016/j.bbih.2023.100593 (PMC9926212; doi:10.1016/j.bbih.2023.100593), 2023-01-18

**Fig. S1**

**A**

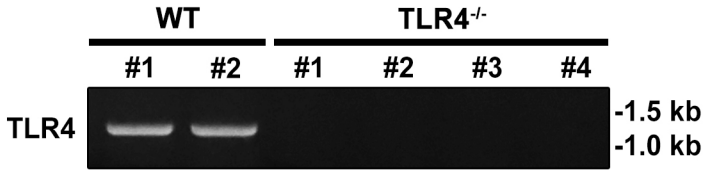

**B**

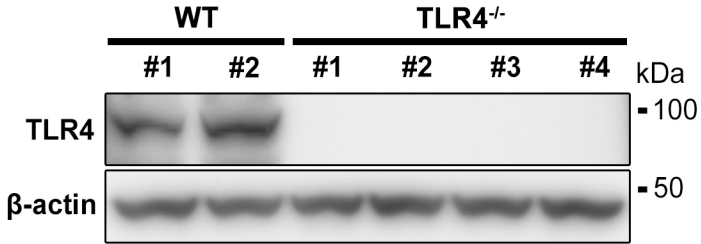

Supplement: mmc1.pdf [file mmc1.pdf]

Fig. S2

A

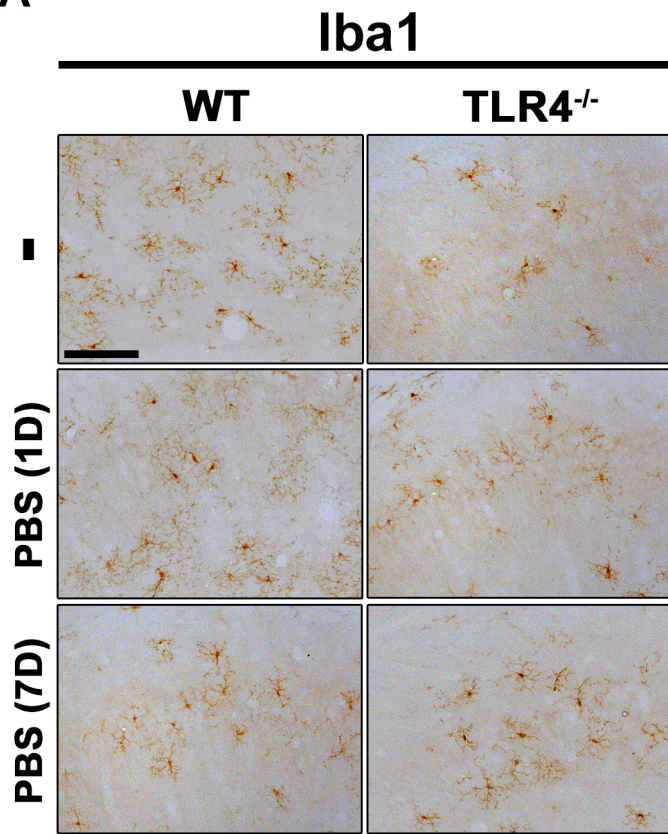

B

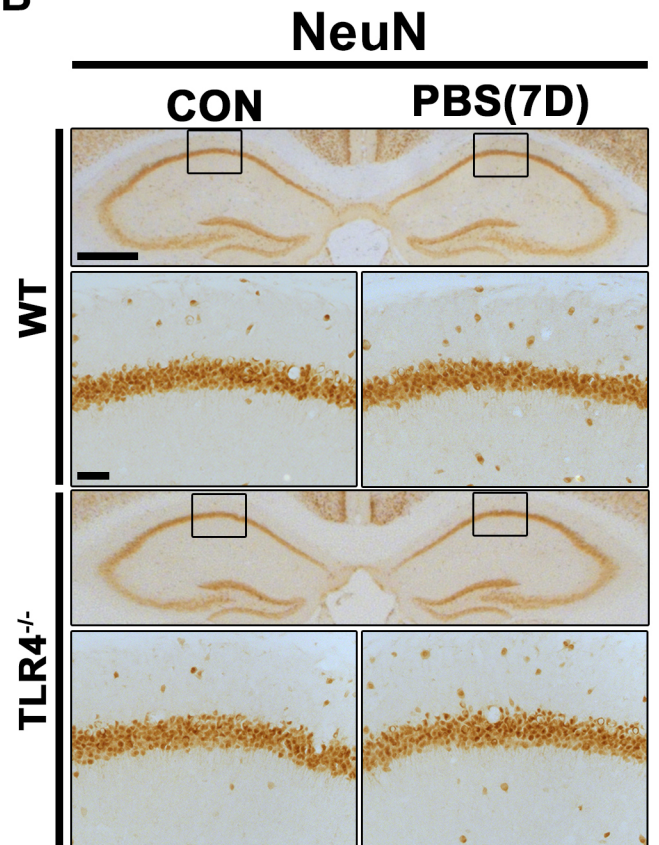

Supplement: mmc2.pdf [file mmc2.pdf]

Fig. S3

A

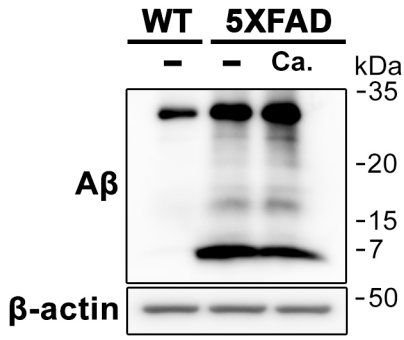

Ca.: caffeine (0.06 mg/ml)

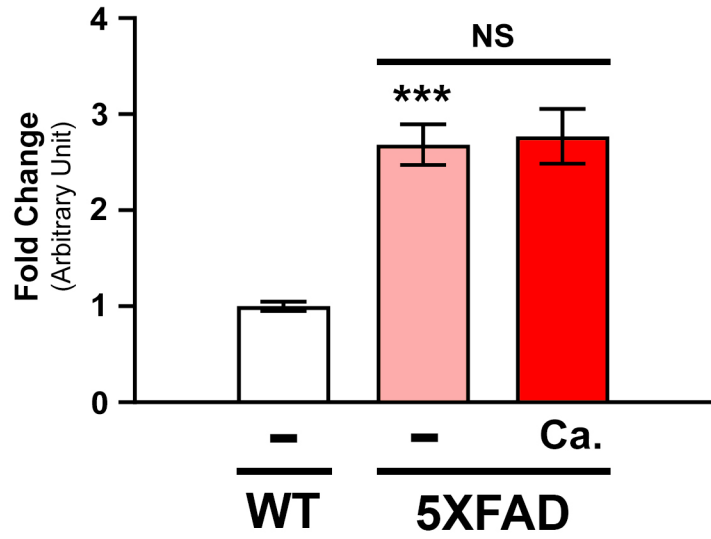

B

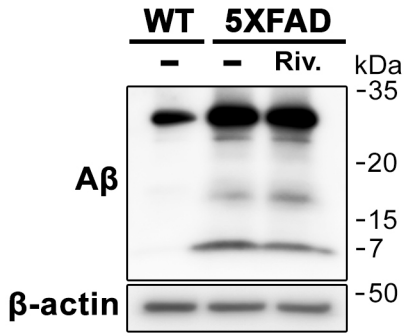

Riv.: Rivaroxaban

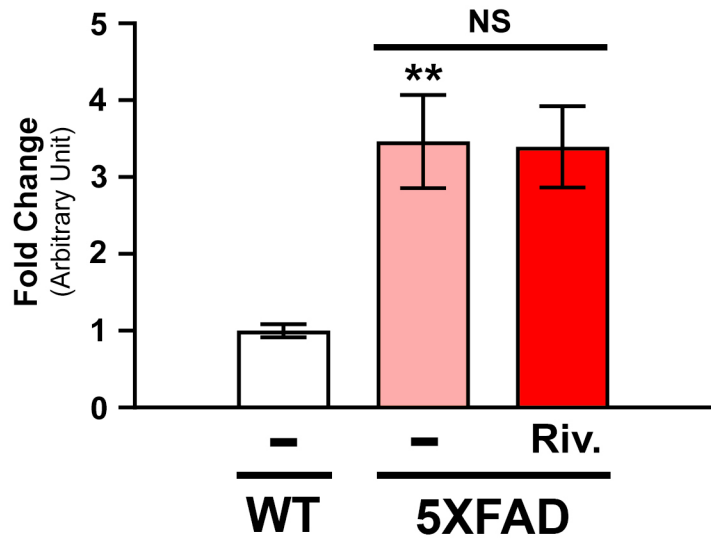

Supplement: mmc3.pdf [file mmc3.pdf]
